# Supplementary material for: Facile roll-to-roll production of nanoporous fiber coatings for advanced wound care sutures
Source: Royal Society of Chemistry journal article supplement (doi:10.1039/d4nr01432d), 2024-01-01
Supplement: d4nr01432d2.pdf [file d4nr01432d2.pdf]

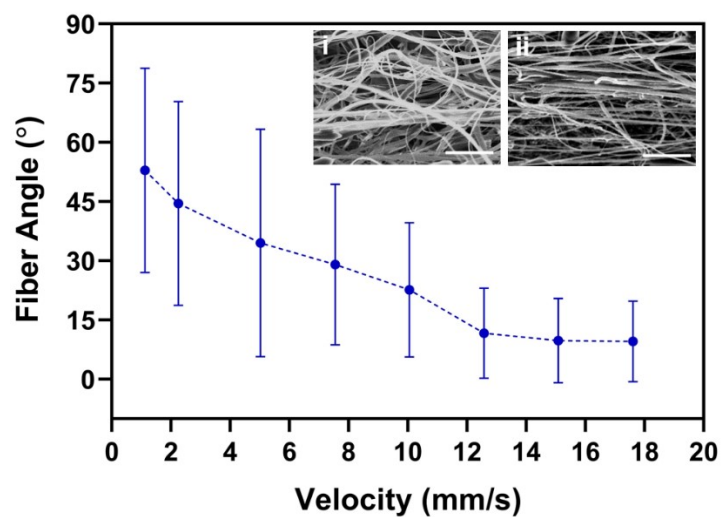

**Figure S2.** The angle of deposited electrospun fibers on the surface of the thread with increasing spooling speed. Inset images of (i) deposited fibers at 1 mm/s and (ii) 17 mm/s spooling velocities.
