# Supplementary material for: Facile roll-to-roll production of nanoporous fiber coatings for advanced wound care sutures
Source: Royal Society of Chemistry journal article supplement (doi:10.1039/d4nr01432d), 2024-01-01
Supplement: d4nr01432d3.pdf [file d4nr01432d3.pdf]

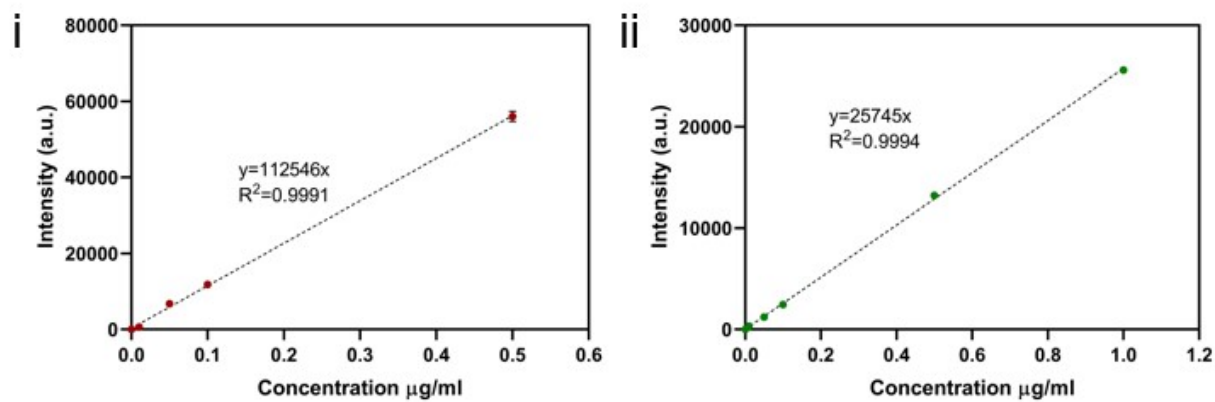

**Figure S3.** Experimentally determined calibration curves of fluorescence intensity for (i) Rhodamine B and (ii) FITC-Dextran in PECF.
