# Supplementary figures and images for: Facile roll-to-roll production of nanoporous fiber coatings for advanced wound care sutures
Source: Royal Society of Chemistry journal article supplement (doi:10.1039/d4nr01432d), 2024-01-01

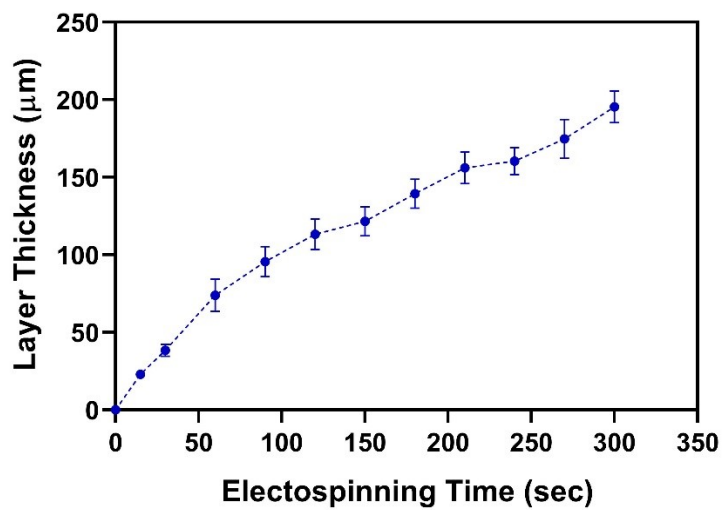

**Figure S1.** The duration of electrospinning linearly increases the coating thickness.

Supplement: d4nr01432d1.pdf [file d4nr01432d1.pdf]
